# Supplementary material for: An integrative analysis of post-translational histone modifications in the marine diatom Phaeodactylum tricornutum
Source: PubMed Central journal article supplement (PMC4504042; doi:10.1186/s13059-015-0671-8), 2015-05-20

H4

Ac at K59

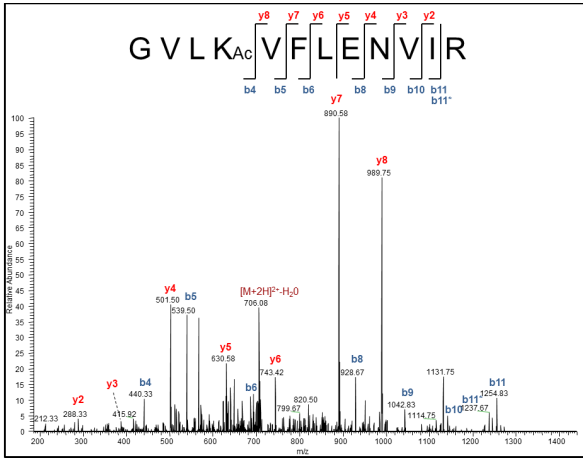

Ac at K31

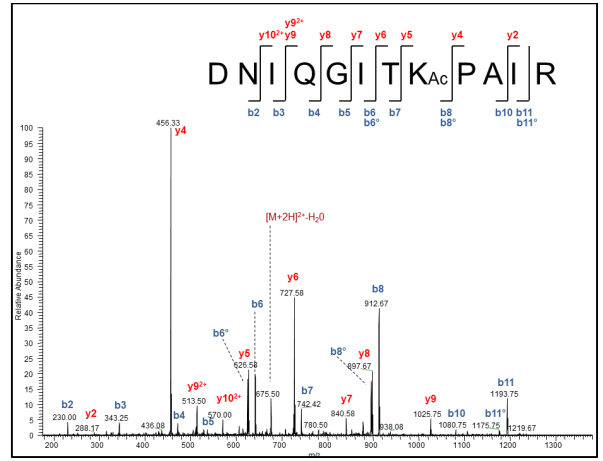

me at K79

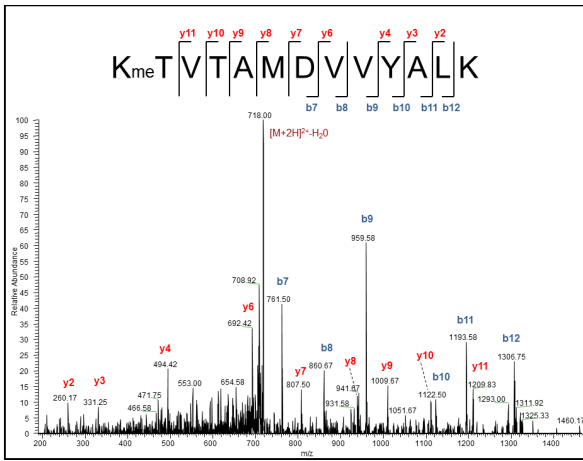

me2 at K79

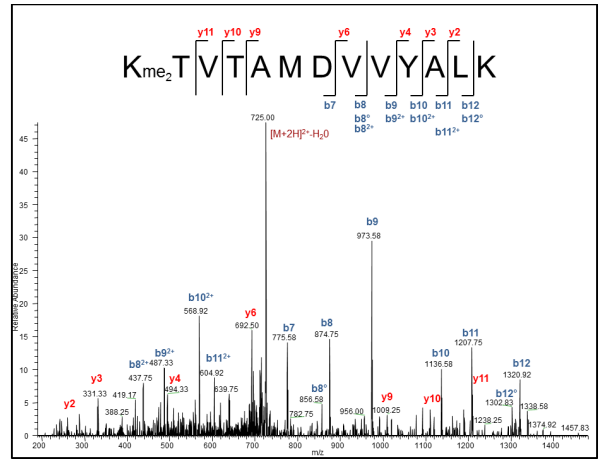

H2B  
Ac at K2,  
K6, K10

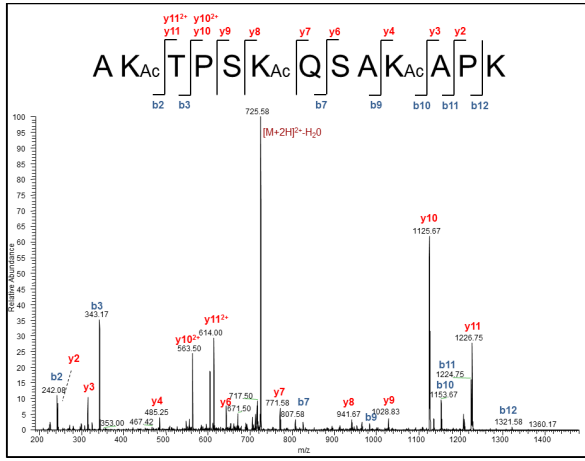

Ac at K34

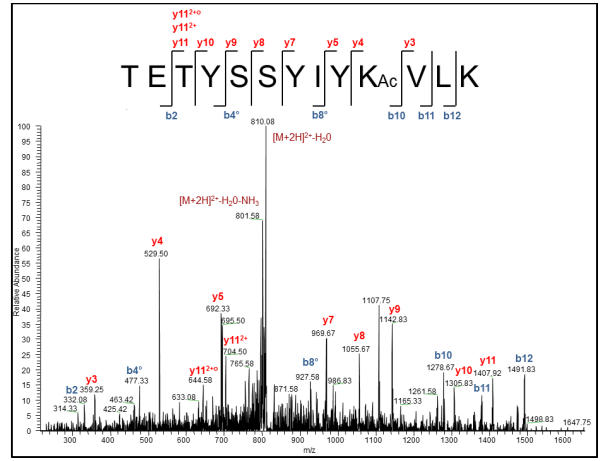

Ac at K107

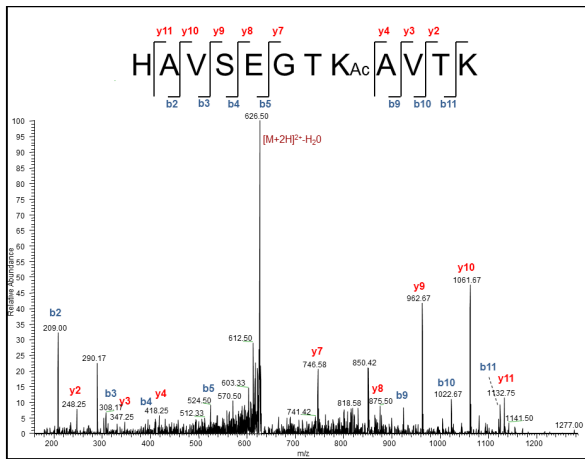

Ub at K111

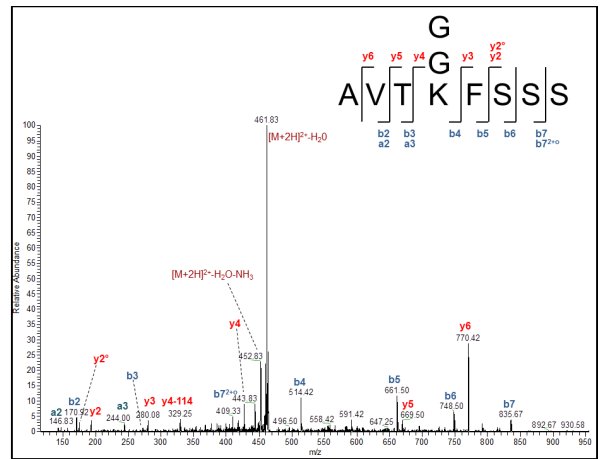

H3  
Ac at K9,  
K14

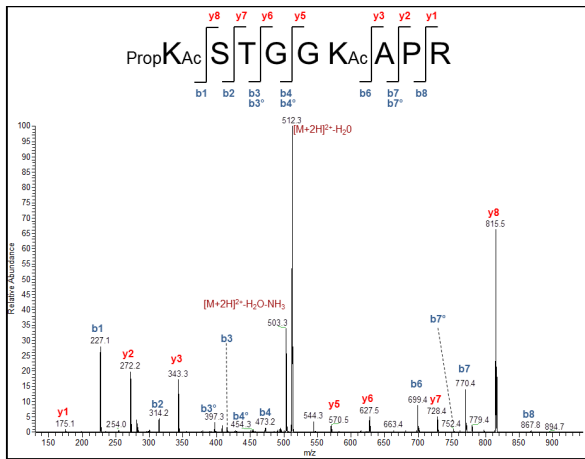

Ac at K9,  
K14  
me3 at K4

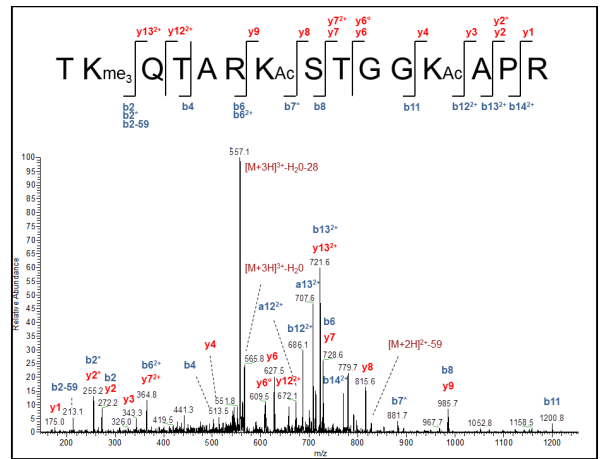

Ac at K9,  
K14  
me2 at K4

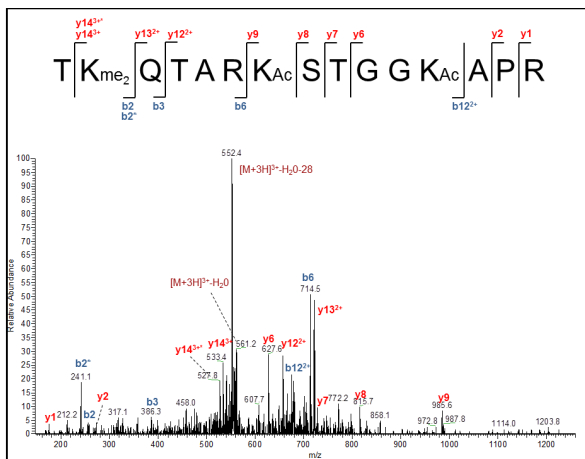

me3 at K27

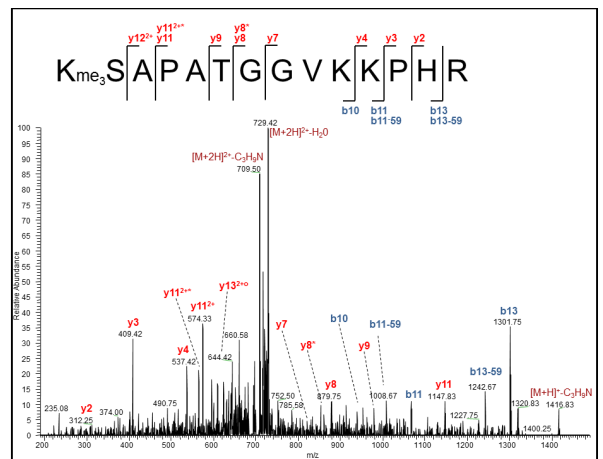

H4

Ac at K59

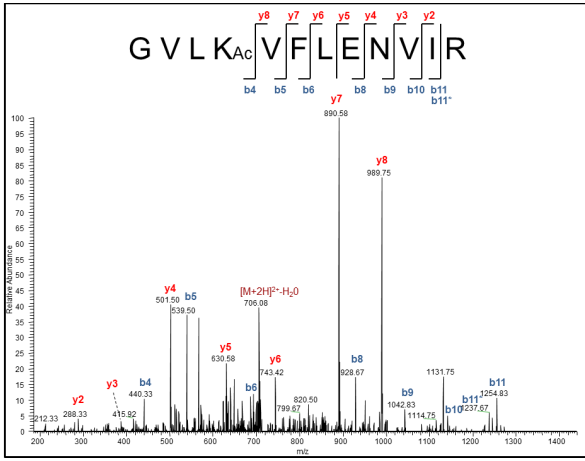

me at K79

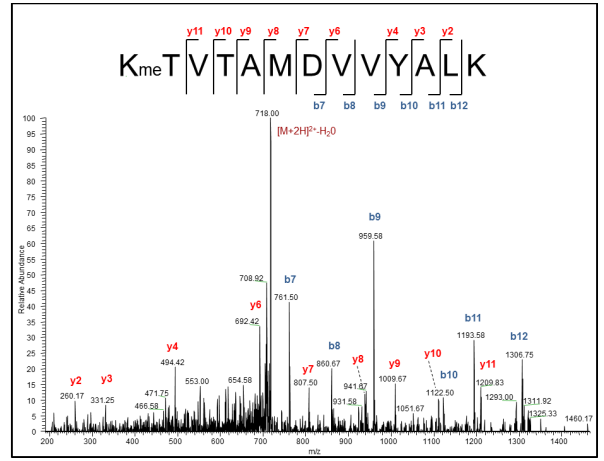

me2 at K79

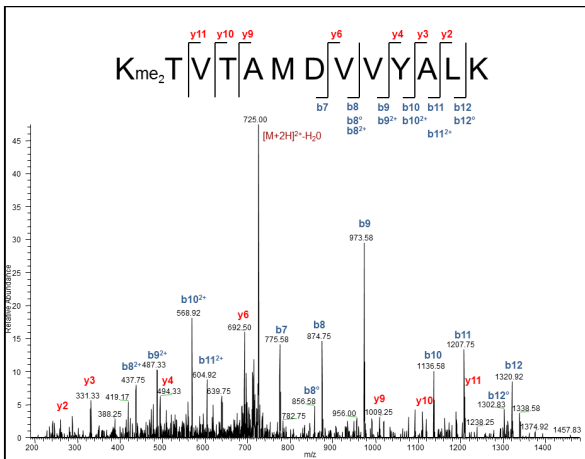

Supplement: 13059_2015_671_MOESM2_ESM.pdf [file 13059_2015_671_MOESM2_ESM.pdf]
