# Supplementary material for: An integrative analysis of post-translational histone modifications in the marine diatom Phaeodactylum tricornutum
Source: PubMed Central journal article supplement (PMC4504042; doi:10.1186/s13059-015-0671-8), 2015-05-20

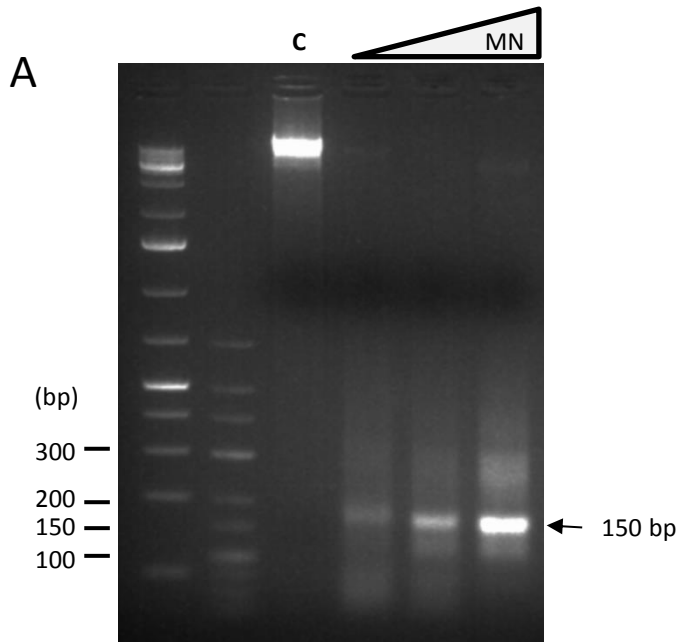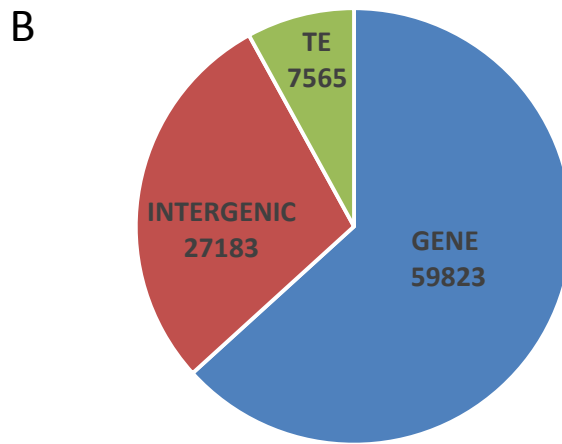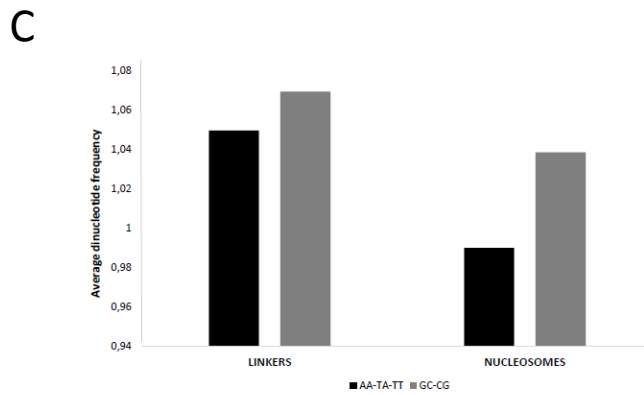

Supplement: 13059_2015_671_MOESM8_ESM.pdf [file 13059_2015_671_MOESM8_ESM.pdf]
